# Supplementary material for: The Largely Linear Response of Earth’s Ice Volume to Orbital Forcing
Source: Copernicus journal article supplement (doi:10.5194/egusphere-2023-2893), 2023-12-20

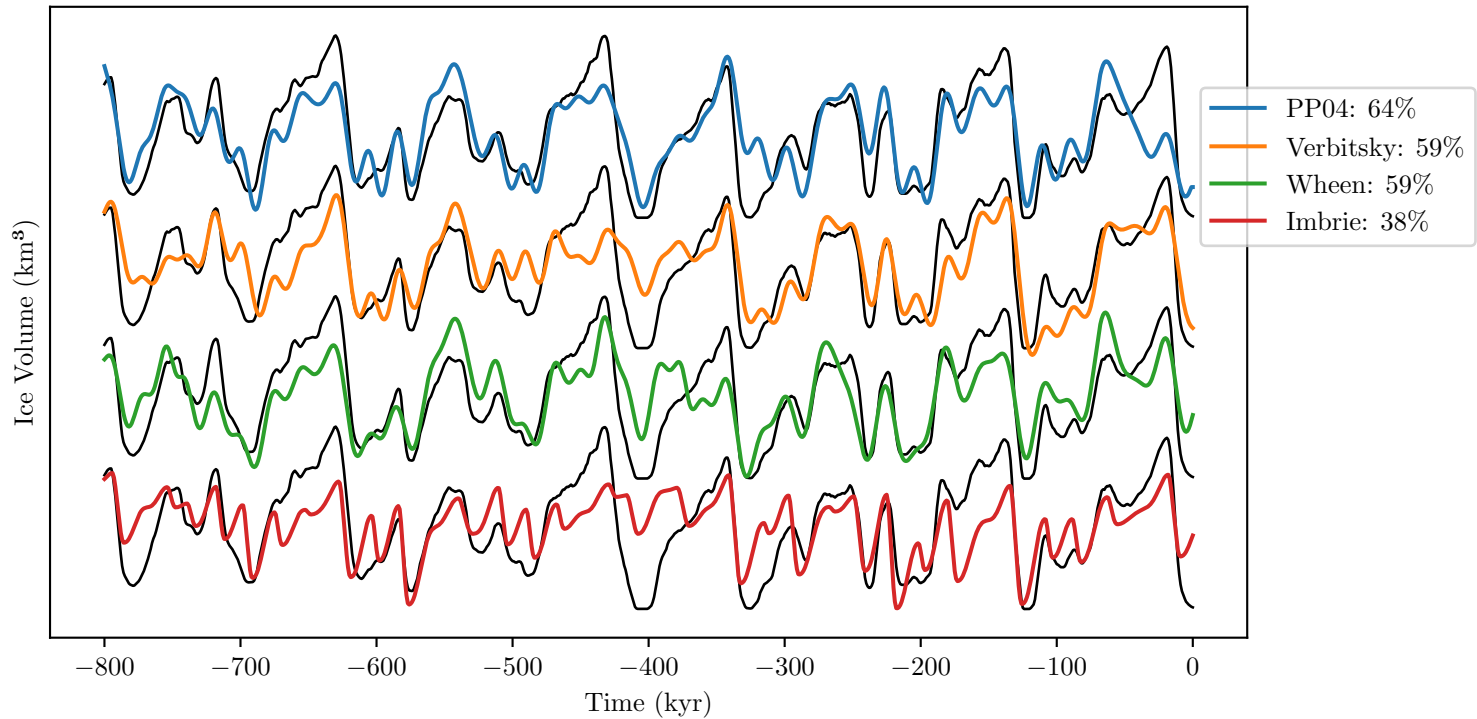

Supplement: Supplementary file [file egusphere-2023-2893-AC3-supplement.pdf]
